# Supplementary material
Source: publisher figshare collection journal article supplement (https://geolsoc.figshare.com/ndownloader/files/14298998)
Supplement: Supplementary file 1 [file 14298998]

## Sheet: Sheet1
37527	RPBB31	RPBB41E	37289	RPBB34A	RPBB35A	RPBB38	RPBB39	37270	37271	RPBB40	RPBB41B	RPBB41C	RPBB41D	37260		NF11	POT2	KAK1	HKO16	MST1		82428	82429	82430a	82431a	8053	4584	81211	7863
basalt	basalt	basalt	basalt	basalt	basalt	basalt	basalt	andesite	andesite	dyke	dyke	Ddke	dyke	dyke		tonalite	Poteriteri intrusion	granite	granite	diorite		gabbro	leucogranite	ol gabbro	ol gabbro	gabbro	trondhjemite	trondhjemite	granodiorite
Mullat Bay	Mullat Bay	Mullat Bay	Mullat Bay	Mullet Bay	Mullet Bay	Mullet Bay	Mullet Bay	Mullet Bay	Mullet Bay	Pahi Point	Pahi Point	Pahi Point	Pahi Point	Pahi Point		Lake Te Anau	SE shore of Lake Poteriteri	Solitary Pk. Cameron Mtns.	NW shore of Lake Hauoko	Melite stream, W Lake Gunn		Longwood Range	Longwood Range	Longwood Range	Longwood Range	Longwood Range	Longwood Range	Longwood Range	Longwood Range
Late Triassic	Late Triassic	Late Triassic	Late Triassic	Late Triassic	Late Triassic	Late Triassic	Late Triassic	Late Triassic	Late Triassic	Late Triassic	Late Triassic	Late Triassic	Late Triassic	Late Triassic		Mid-Carboniferous	Late Carboniferous	Middle Carboniferous	Early Carboniferous	Late Triassic		Late Permian	Late Permian	Late Permian	Late Permian	Early Triassic	Early Triassic	Late Permian
54.87	58.35	60.62	64.93	42.41	42.81	44.74	44.95	60.12	60.3	48.65	55.34	52.89	60.18	41.46								45.84	48.04	45.21	41.41	51.49	69.58	73.36	60.87
0.8	0.74	0.87	0.62	0.29	0.39	0.29	0.22	0.89	0.98	0.9	0.88	0.95	0.69	1.91		0.57	0.1	0.23	0.4	1.02		0.42	0.81	0.19	0.02	0.69	0.24	0.14	0.79
17.97	19.44	17.11	16.9	8.03	8.28	23.32	19.68	16.74	17.07	16.55	17.72	16.88	18.24	18.79								19.55	22.41	18.88	23.76	18.15	16.82	14.31	16.49
2.25	2.27	2.5	1.8	4.05	3.87	2.38	1.51	2.05	2.14	2.81	2.6	2.95	2.88	6.2								9.39	9.19	5.41	6.35	10.41	2.16	2.57	6.2
5.46	2.95	3.21	2.22	10.68	10.41	4.15	4.58	3.94	3.89	6.24	4.41	4.6	3.24	7.47
0.14	0.11	0.09	0.09	0.2	0.19	0.1	0.08	0.11	0.13	0.13	0.12	0.12	0.1	0.16								0.15	0.13	0.08	0.09	0.18	0.05	0.02	0.1
4.13	2.15	3.03	1.43	23.59	22.62	8.19	11.8	2.56	2.3	9.49	4.81	6.31	2.34	7.41								7.96	3.7	10.58	12.84	4.74	0.56	0.25	2.81
8.14	5.37	5.38	3.74	7.88	8	13.88	14.52	5.34	4.83	9.9	6.77	5.86	5.59	12.53								14.79	12.6	18.36	12.92	8.73	5.07	3	5.1
3.5	5.71	2.92	4.87	0.57	0.98	1.1	0.81	4.23	4.22	1.99	2.72	2.38	3.13	2.17								0.98	2.48	0.27	0.36	2.25	3.4	4.57	3.99
1.25	1.28	1.86	2.55	0.1	0.1	0.05	0.05	2.26	2.62	0.59	1.72	3.49	1.45	0.29								0.13	0.25	0.01	0.03	0.48	1.33	0.59	2.57
0.17	0.28	0.27	0.18	0.04	0.06	0.04	0.04	0.19	0.19	0.19	0.27	0.37	0.31	0.35								0.07	0.15	0.07	0.05	0.1	0.12	0.04	0.24
			99.98											100.51
	433	382	591	53	78	41	42	129.6	444	176	428	728	348	47.3		270	631	746	500			8	69	< 5	11	122	280	220	344
26.5	33.5	34.5	48	3.9	5.5	2.3	2.3	36	36.1	18.5	22.9	27	34.8	10.7		23.4	69.3	80	52.2			< 5	16	< 5	< 5	12	38	16	62
			5					10.6					4	37.8		3	12	14	63			140	7	328	18	34	6	< 1	32
3.5	1.6	3.3	3.5	0.1	0.1	0.2	0.1	4.9	6.4	0.7	2	3.1	2.9	0.1		2.5	8.5	5.8	6.1
								27.9	29					145.2								28	76	4	7	87	3	28	35
	2.21	2.97		0.46	0.57	0.34	0.46	3.3	4.02	1.97	1.88		2.97	2.6
	1.21	1.55		0.24	0.28	0.16	0.23	1.9	2.24	1.05	1.01		1.55	1.3
1.1	1.37	1.08	1.04	0.25	0.31	0.35	0.29	1.1	1.15	0.89	0.92	0.95	1.08	1		0.56	0.77	1.35	1.39
													4			14	15	18	24			15	20	10	9	19	16	13	17
4.3	2.67	3.41	4.7	0.53	0.7	0.42	0.54	4	4.7	2.39	2.23	2.8	3.41	3.1		2.4	6.8	4.5	4.5
1.9	4.1	4.4	4.8	0.3	0.4	0.7	0.2	6.1	4.2	1.6	2	1.2	4.4	1.1		3.7	4.2	5.3	4.8
0.8		0.8	0.95	0.08		0.06		0.7	0.83	0.39		0.5		0.5
11.2	17	15.6	19.4	1.8	2.6	1.2	1	13.7	17.1	7.7	11.1	13	15.6	3.4		10.2	32	38	23.4			5	5	5	5	5	6	13	16
0.3	0.19	0.22	0.33	0.02	0.03	0.02	0.03	0.3	0.36	0.16	0.13	0.1	0.22	0.2		0.36	0.48	0.28	0.25
1.9	3.8	4.9	6.3	0.6	0.4	0.7	0.1	5	6.6	2	2.4	2	4.9	1.6		7	10	12	7			< 1	< 1	< 1	< 1	< 1	4	< 1	7
15.4	15.9	18.3	25	2.1	3.4	1.4	1.8	18.8	22.1	11.1	11.9	14	18.3	10		14.6	28	32.4	28.5
11		21	5	583	524	182	190	6.2	7	176	46	104	9	23.8		4	7	8	26			45	11	84	190	20	4	1	19
14	11.4	12.6	18.6	2.6	2.3	1.4	1.5	4.5	18.1	7	12.2	22	12.6	2.9		18	28	15	19			6	7	5	2	7	5	10	12
	4	4.5		0.5	0.7	0.3	0.4	4.7	5.7	2.6	2.9		4.5	1.9
38		57	83	3	2	3	3	28.1	94	15	61	149	41	1.3		153	167	124	70			5	5	< 1	< 1	7	27	9	88
	600	200		200	400	300	300			1000	200	300	500
23	12	14	6.2	26	26	20	28	12.9	15.1	26	21	18	10	35.9		4	5.4	5.9	14.2			45	28	54	10	34	1	2	21
4.2	3.3	4.1	4.8	0.6	0.8	0.4	0.6	4.3	5	2.5	2.7	2.5	4.1	2.9		2.45	6.51	5.67	5.61			302	447	254	284	270	559	280	385
501	627	649	451	402				324.6	467			732	687	574.6		55	149	572	682
	0.42	0.68		0.08	0.1	0.47	0.17	0.7	1.1	0.24	0.36		0.68	0.4		1.08	1.38	1.26	3.3
0.69		0.68	0.76	0.08		0.06		0.6	0.72	0.35		0.45		0.5		0.51	1.11	0.72	0.68
5.5	4.78	6.04	10.4	0.24	0.48	0.1	0.08	6.9	8	0.56	2.61	2	6.04	0.1		11	18	13	8			1	1	1	1	1	3	4	9
				0.03		0.02		0.3	0.35	0.15				0.2		0.35	0.49	0.32	0.25
0.5	1.26	1.34	3	0.09	0.16	0.03	0.02	2	1.39	0.19	0.76		1.35	0.1		1.82	4.28	2.38	3.85			< 1	< 1	< 1	< 1	< 1	< 1	1	4
206	105	123	63	138	159	87	73	134.6		216	181	181	82	370.3		14	26	43	146			325	325	117	7	319	33	20	150
16	12.9	16.8	21	2.4	2.9	1.8	2.3	20.9		11.7	10.6	9	16.8	14.5		19	29	19	16			4	13	< 1	< 1	15	8	4	23
1.89	1.17	1.45	2.35	0.19	0.23	0.12	0.17	1.9	2.25	0.97	0.92	0.71	0.45	1.1		2.49	3.35	2.16	1.66
85	81	82	66	122	120	51	43	61.3	85	86	88	101	84	90		29	39	52	82			50	58	19	29	101	37	18	77
99	170	175	229	34	42	72	77	209.2		80	110	99	147	18.7		82	101	182	122			12	24	8	7	44	91	115	149
